# Supplementary material
Source: ML conference proceedings conference paper supplement (https://openreview.net/forum?id=PocqkbIelt)

(a) Tradeoff between Validity and Proximity

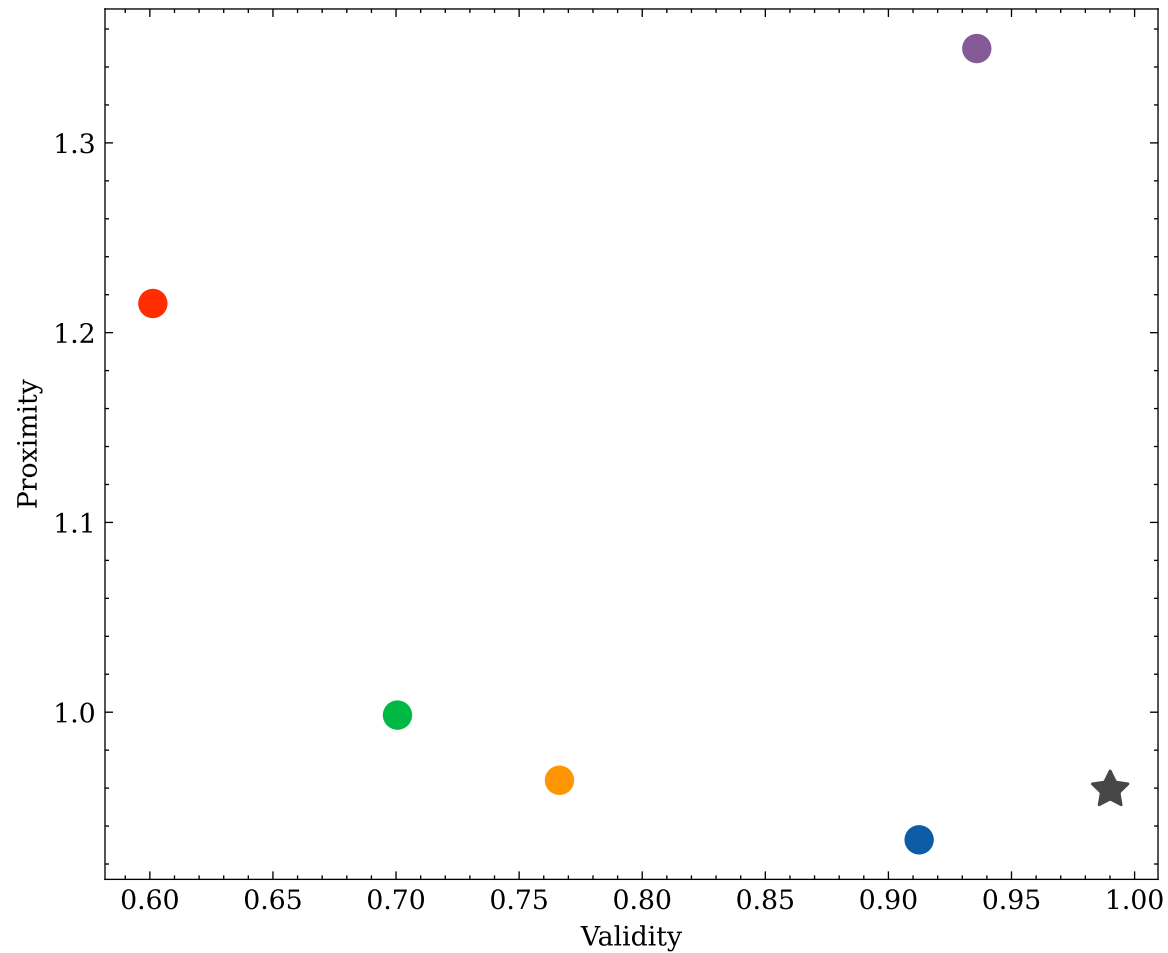

(b) Tradeoff between Second-Order Validity and Sparsity

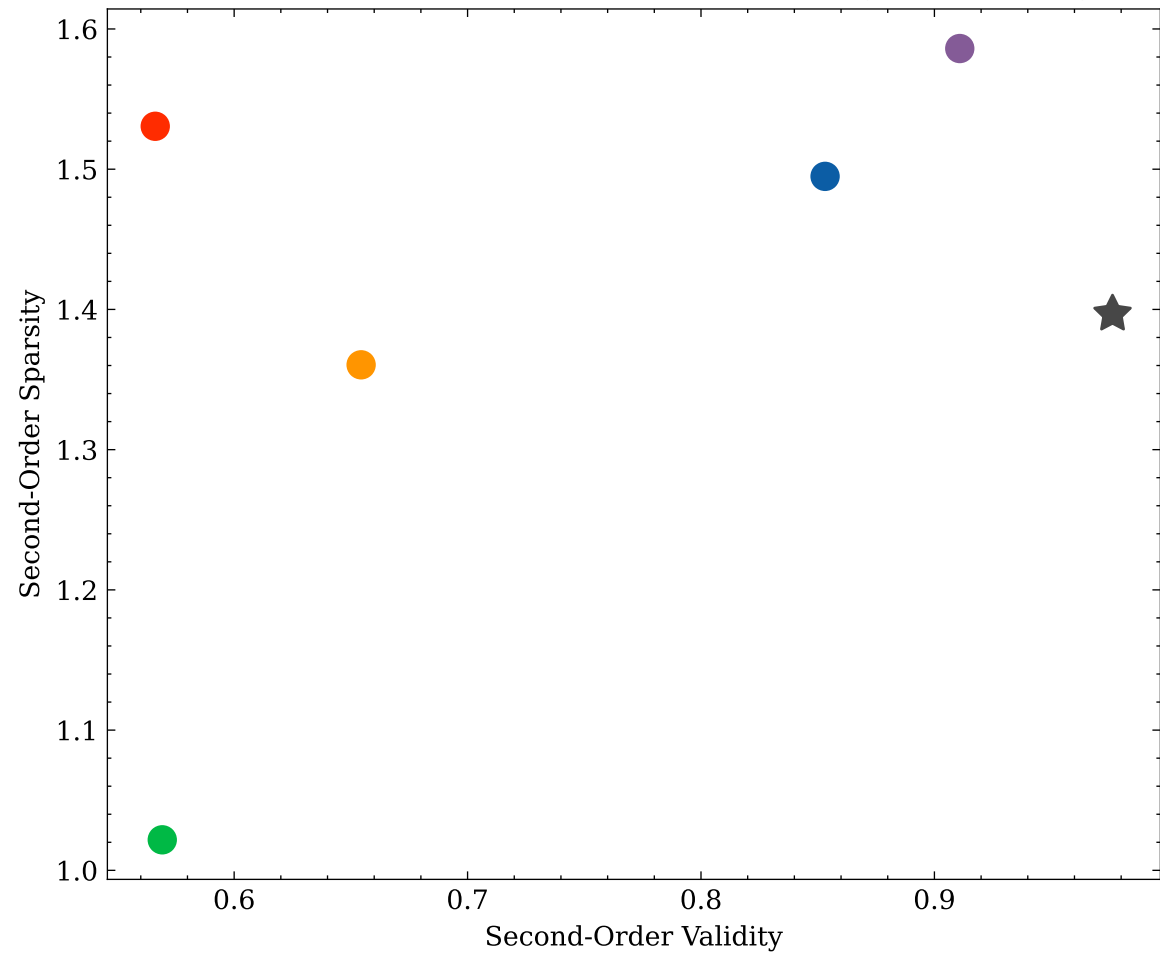

Supplement: supplementary_material [file attachment]
