# Supplementary material
Source: ML conference proceedings conference paper supplement (https://openreview.net/forum?id=PocqkbIelt)

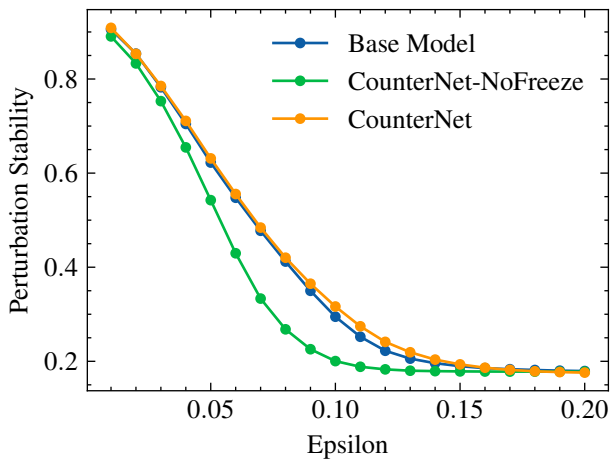

Supplement: supplementary_material [file attachment]

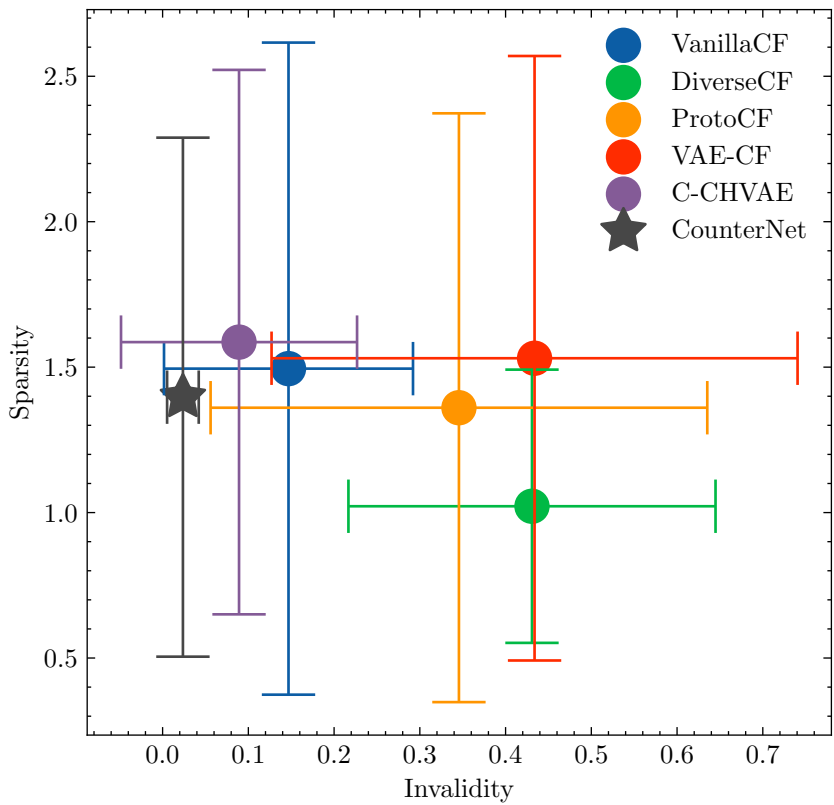

Supplement: supplementary_material [file attachment]

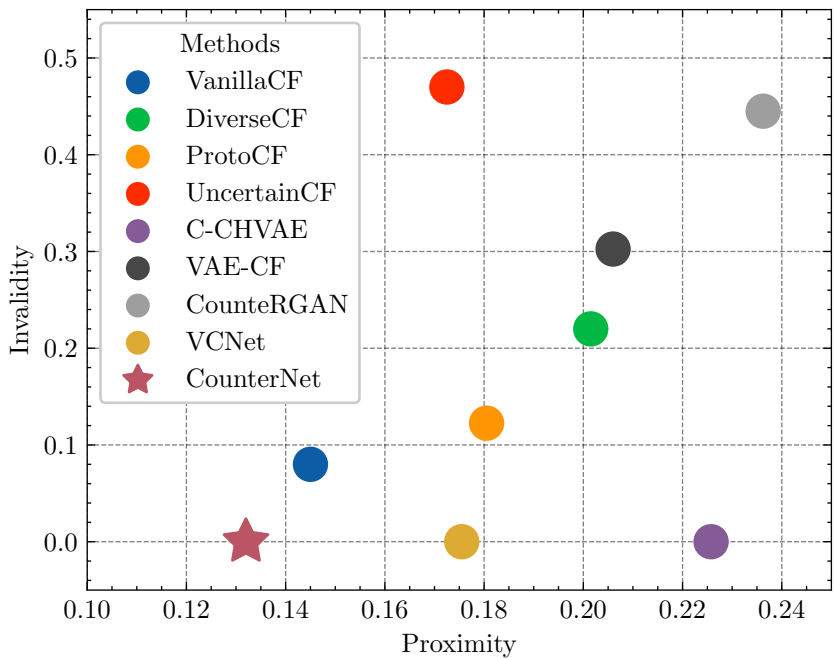

Supplement: supplementary_material [file attachment]

Predictive Accuracy ( $\mathcal{L}_1$ )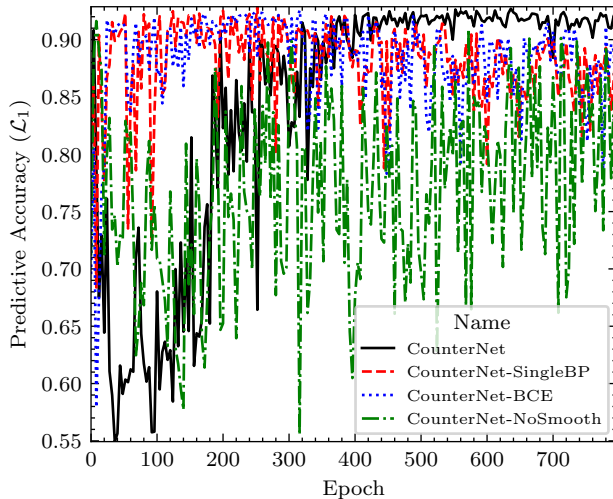Validity ( $\mathcal{L}_2$ )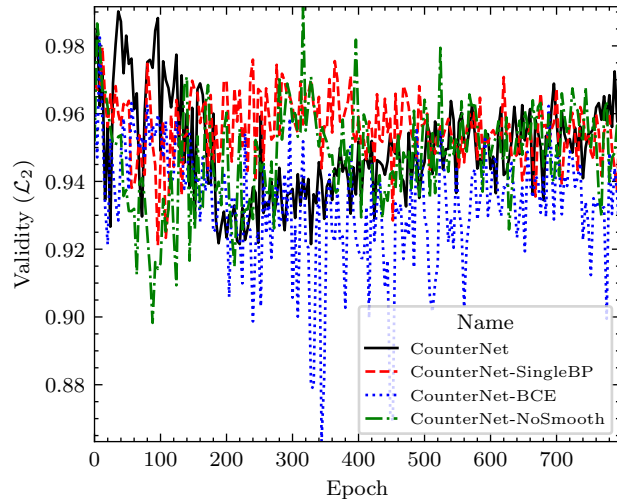Proximity ( $\mathcal{L}_3$ )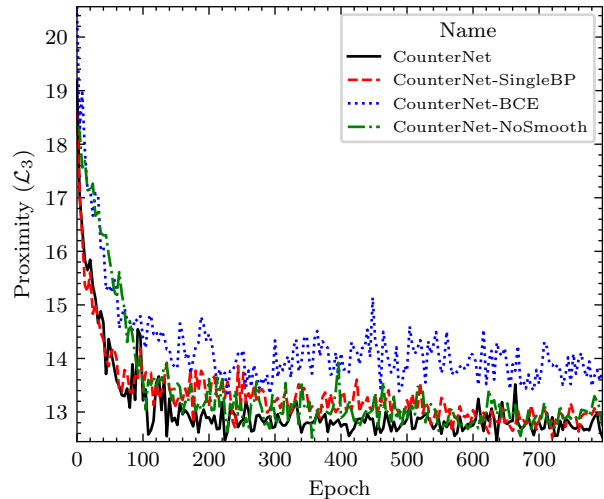

Supplement: supplementary_material [file attachment]

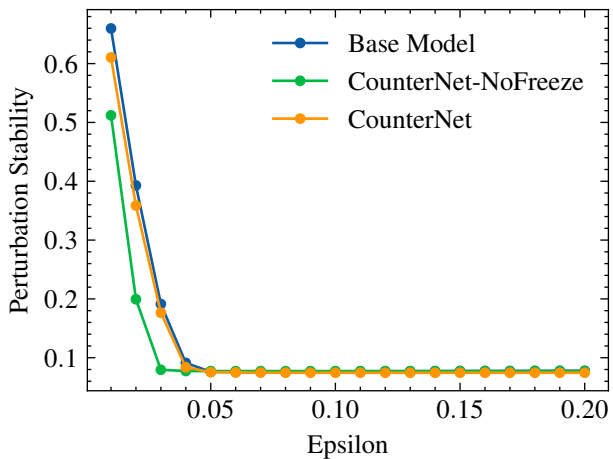

Supplement: supplementary_material [file attachment]

Predictive Accuracy ( $\mathcal{L}_1$ )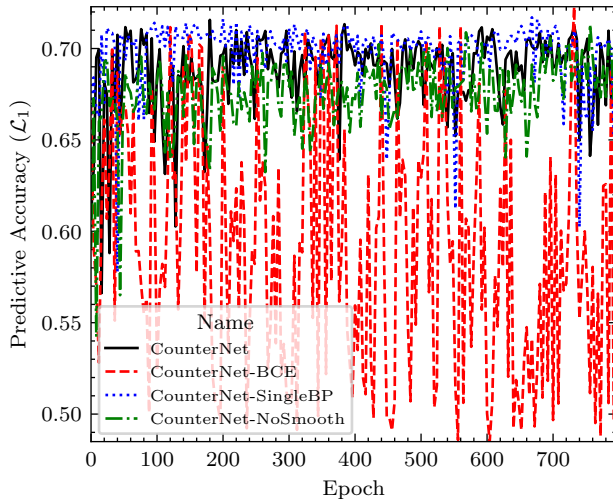Validity ( $\mathcal{L}_2$ )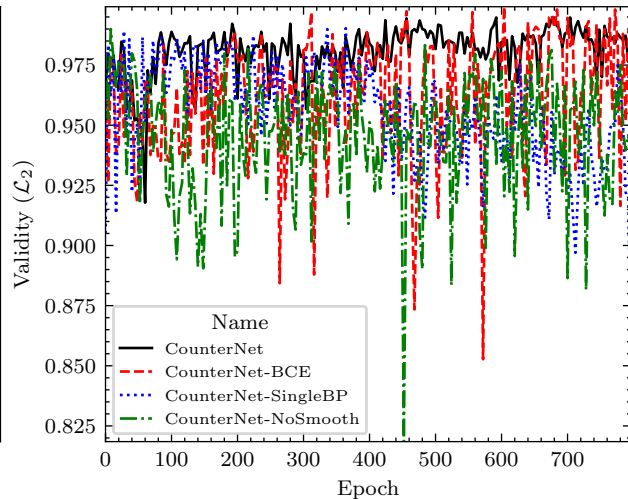Proximity ( $\mathcal{L}_3$ )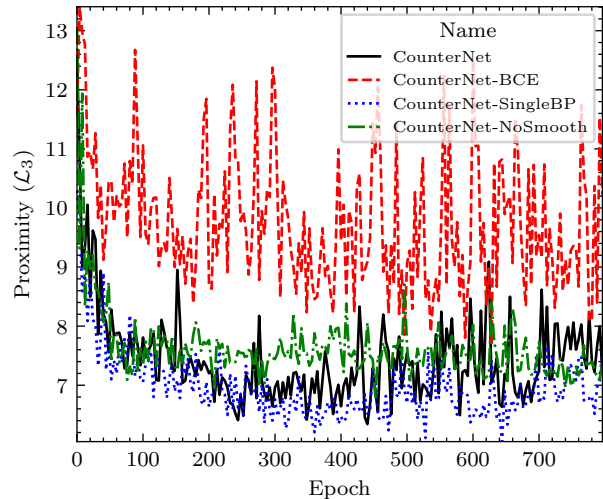

Supplement: supplementary_material [file attachment]

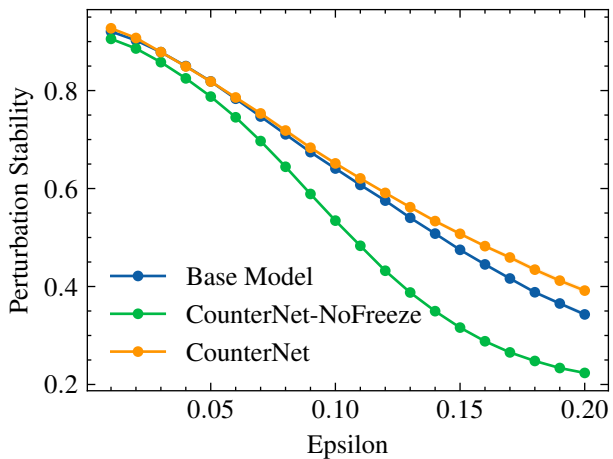

Supplement: supplementary_material [file attachment]

Perturbation Stability

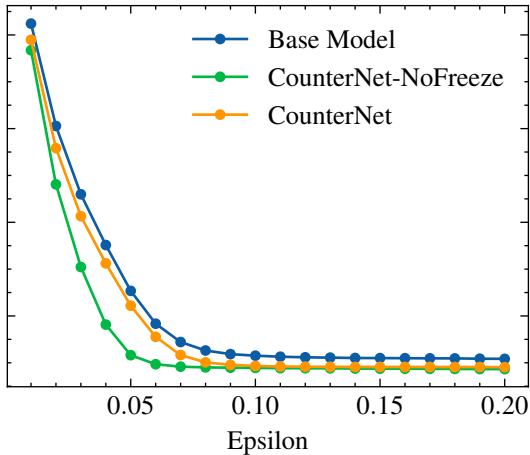

Supplement: supplementary_material [file attachment]

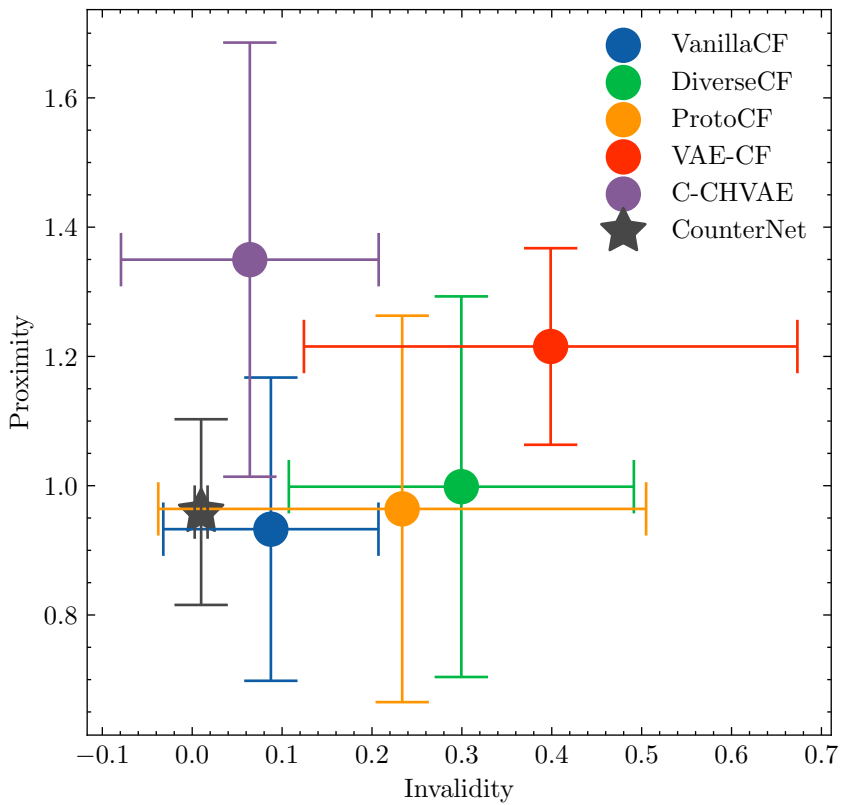

Supplement: supplementary_material [file attachment]

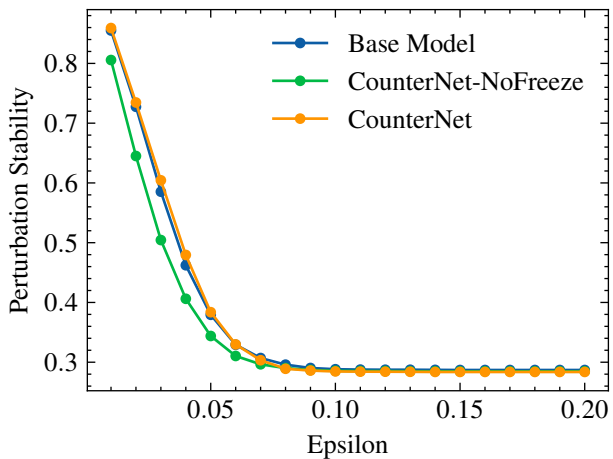

Supplement: supplementary_material [file attachment]

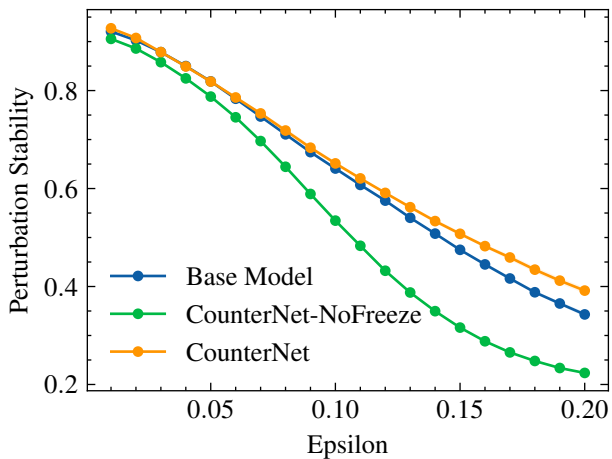

Supplement: supplementary_material [file attachment]

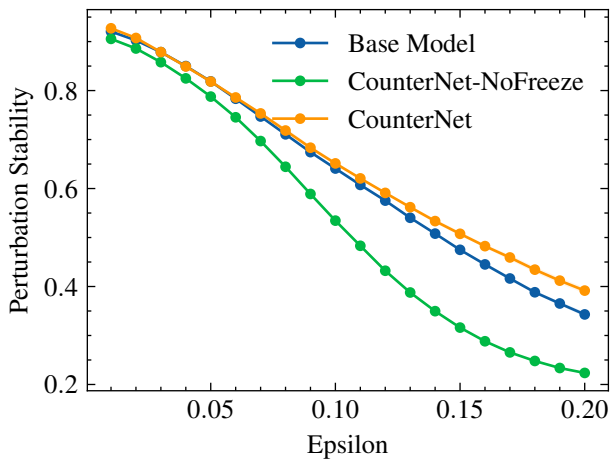

Supplement: supplementary_material [file attachment]

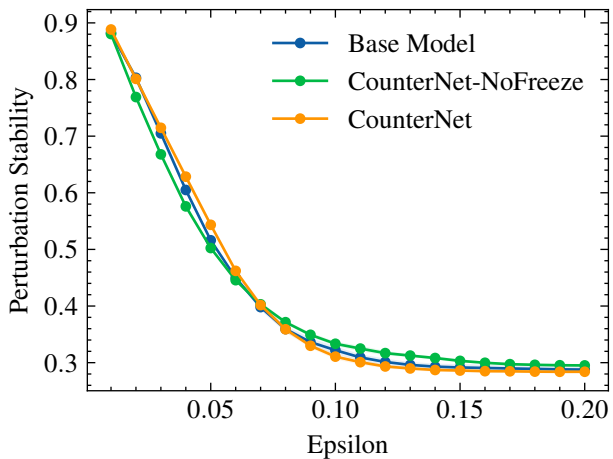

Supplement: supplementary_material [file attachment]

Predictive Accuracy ( $\mathcal{L}_1$ )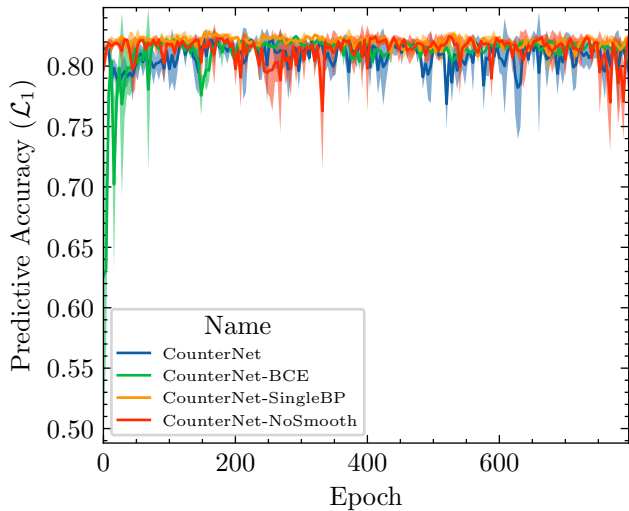Validity ( $\mathcal{L}_2$ )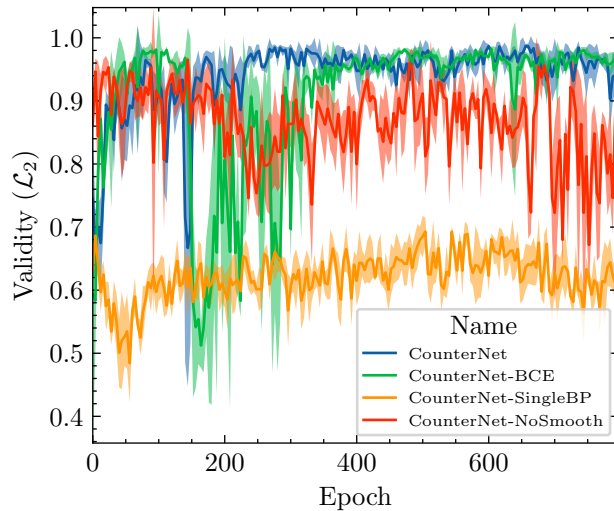Proximity ( $\mathcal{L}_3$ )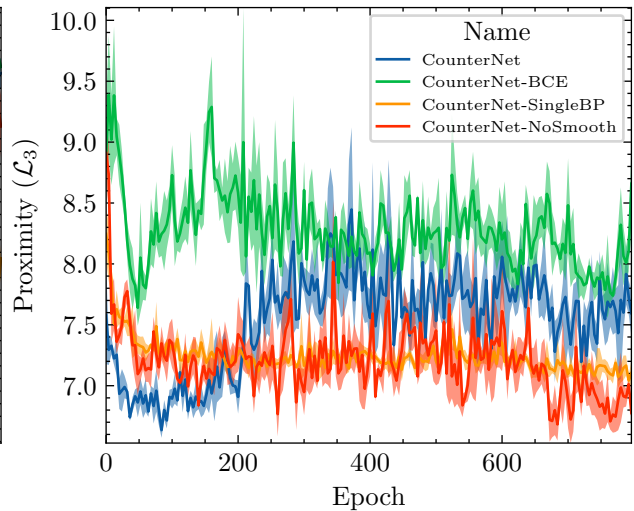

Supplement: supplementary_material [file attachment]

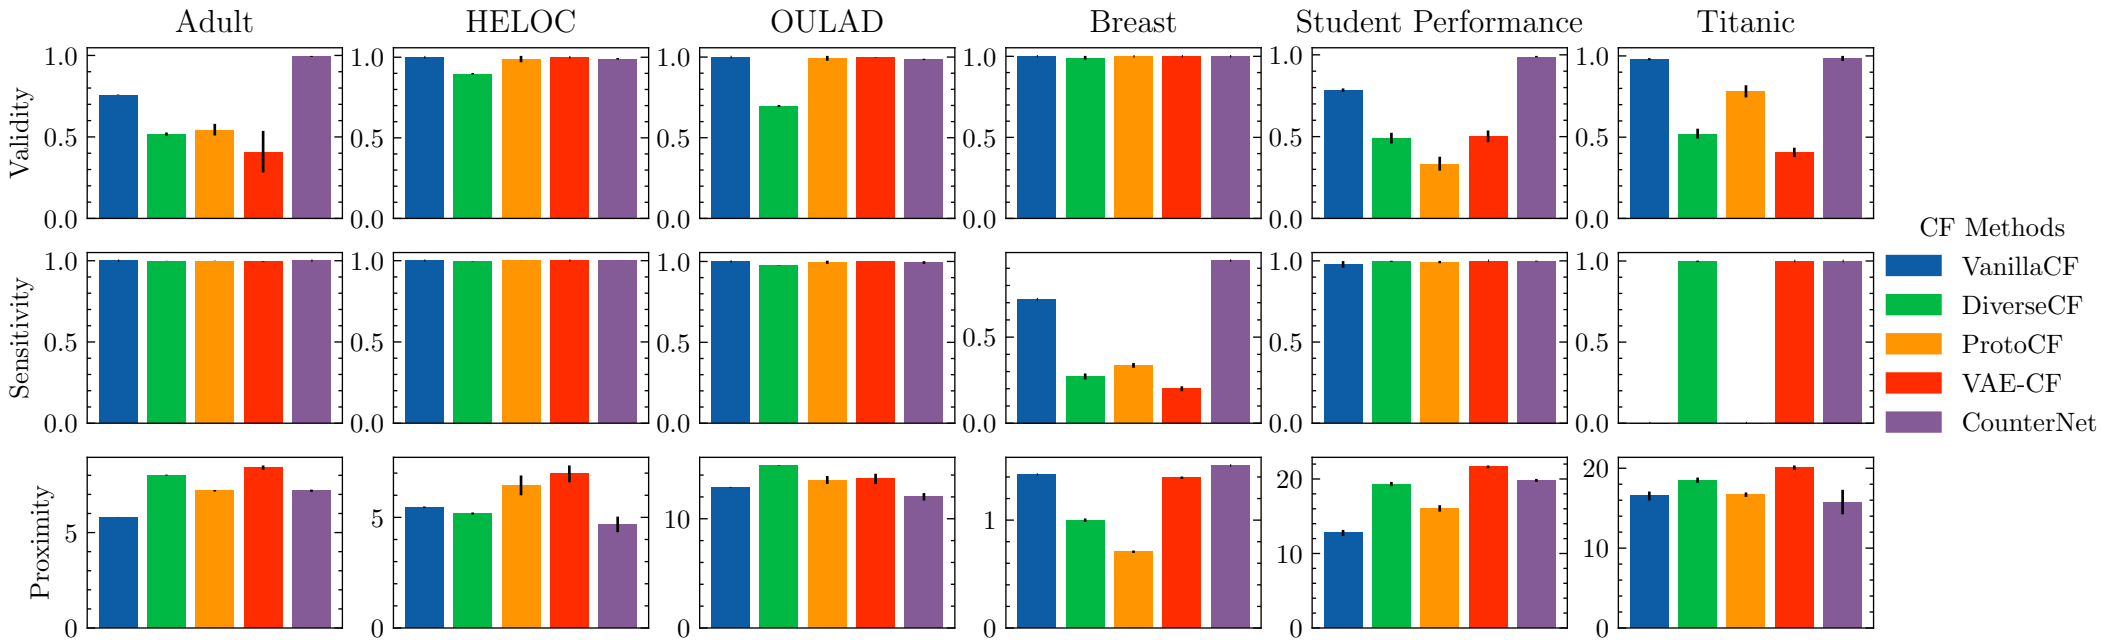

Supplement: supplementary_material [file attachment]
